# Supplementary material
Source: Springer Nature journal article supplement (https://www.springermedizin.de/resource/supplementary/40248_2012_82_MOESM2_ESM.pdf/9686068)

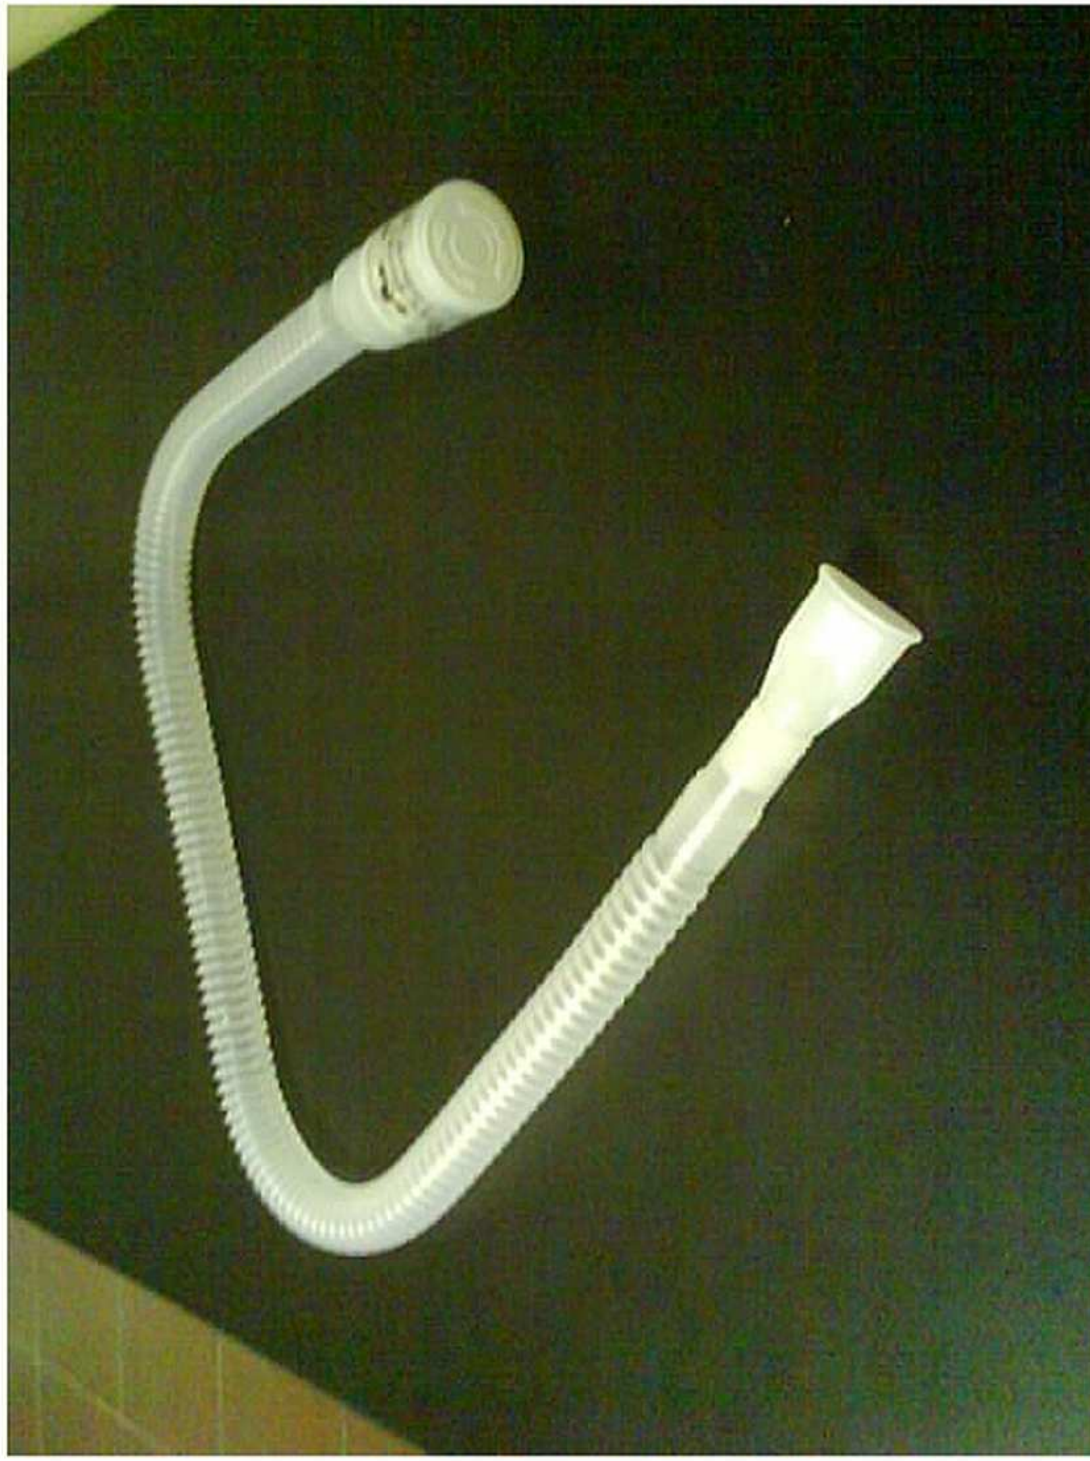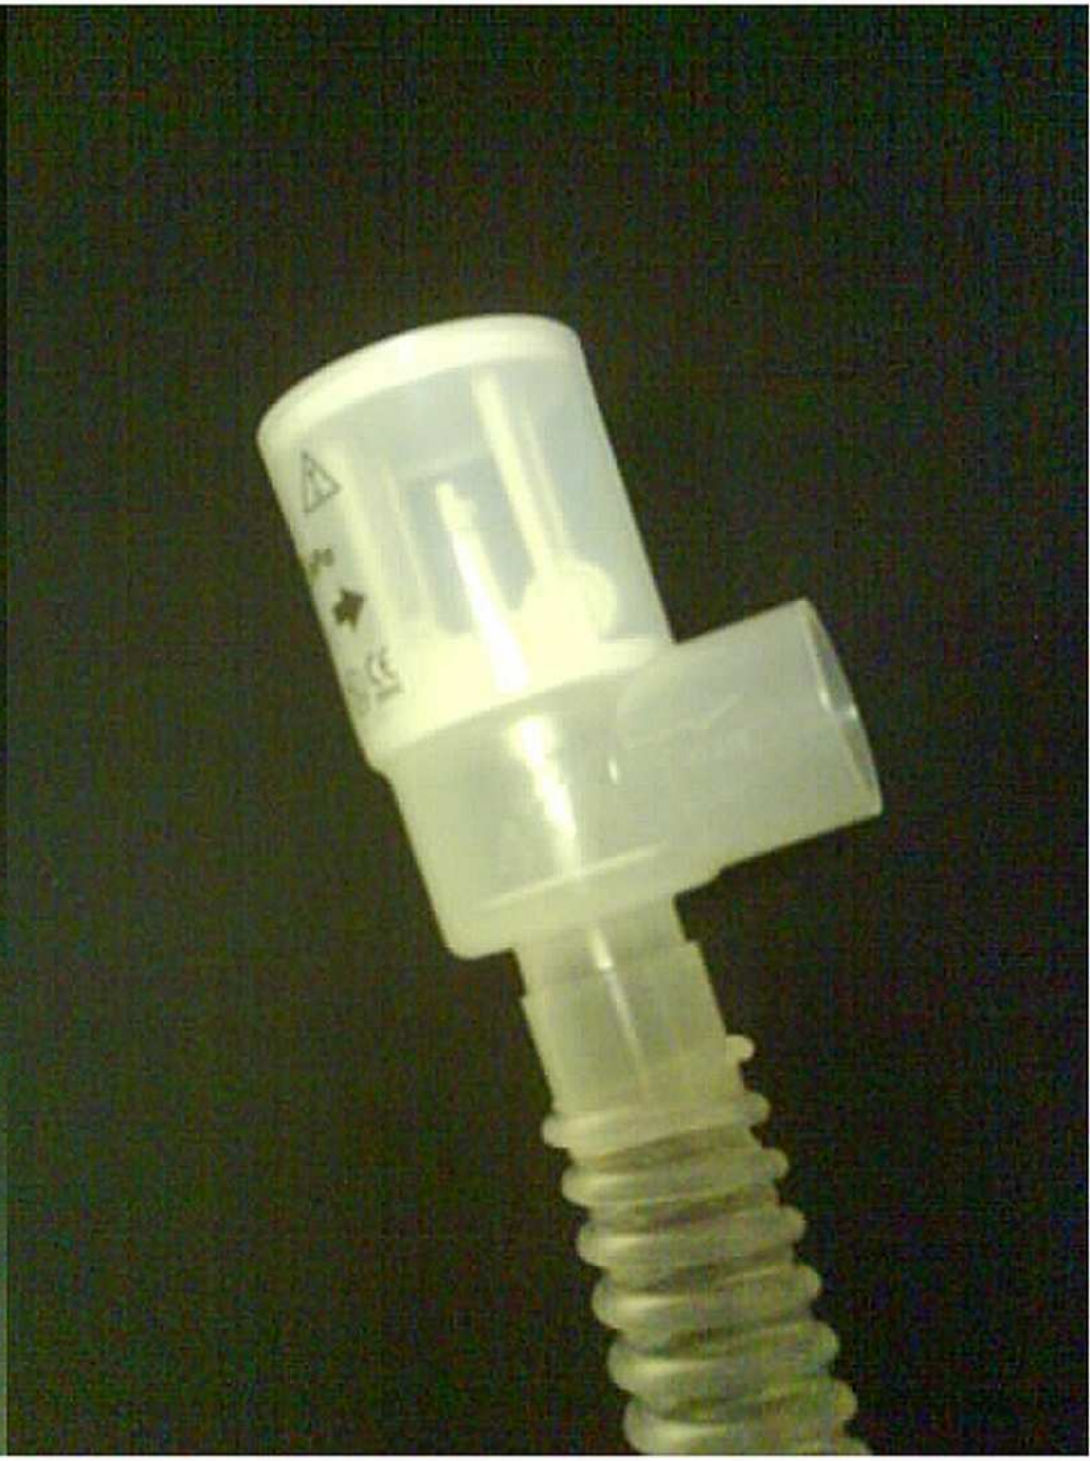

Supplement: MOESM2 [file 9686068]
